# Supplementary material
Source: MDPI journal article supplement (https://www.mdpi.com/2072-4292/15/6/1603)
Supplement: s1 [file s1]

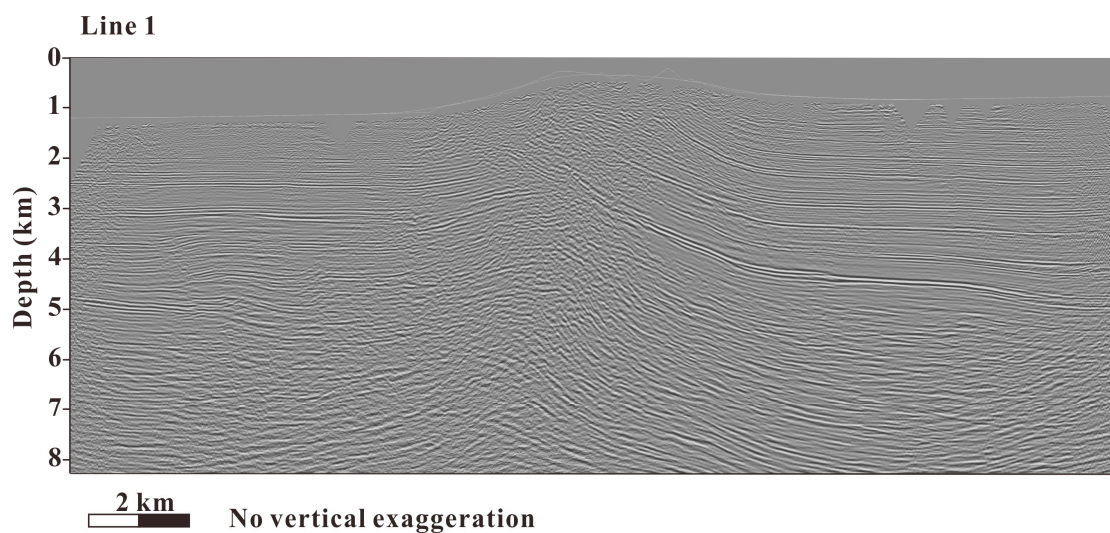

**Figure S1.** Un-interpreted seismic profile in Figure 9.

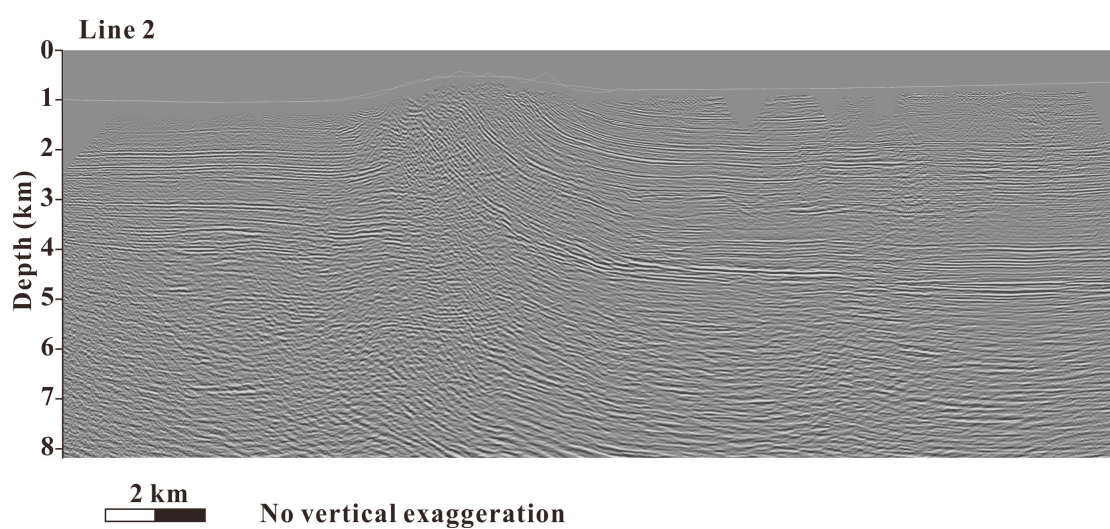

**Figure S2.** Un-interpreted seismic profile in Figure 10.

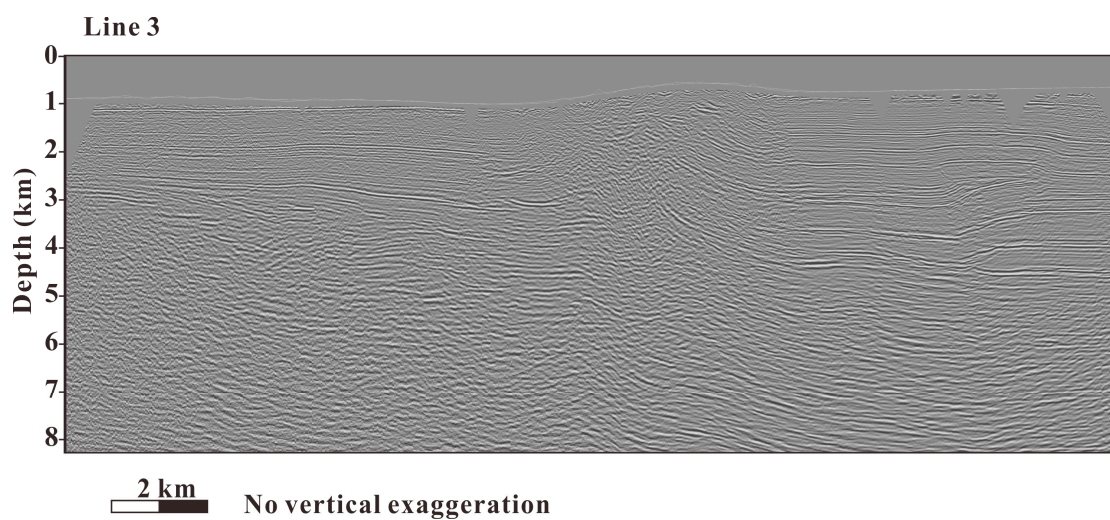

**Figure S3.** Un-interpreted seismic profile in Figure 11.
